# Supplementary material for: Drosophila astrocytes cover specific territories of CNS neuropil and are instructed to differentiate by Prospero, a key effector of Notch
Source: Oxford University Press journal article supplement (doi:10.1242/dev.133165), 2016-01-01
Supplement: dev133165supp.pdf [file dev133165supp.pdf]

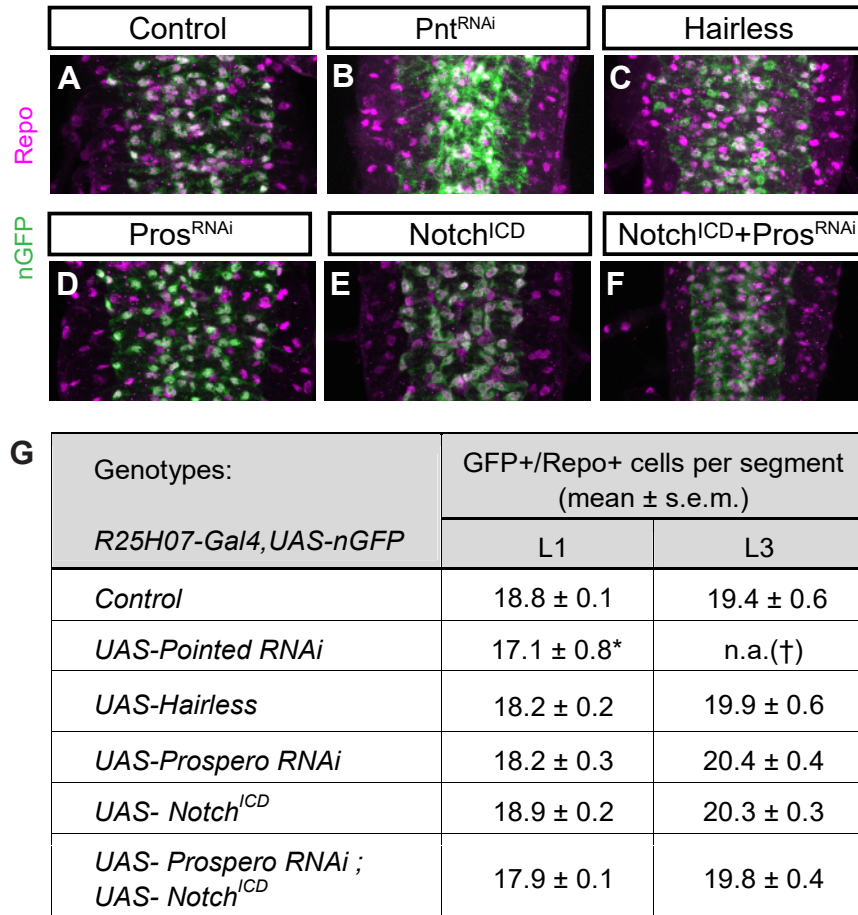

**Figure S1. Effect of Pointed, Notch signaling or Prospero on glial cell number.**

(A-F) L1 VNCs of *R25H07-Gal4,UAS-nGFP* (nGFP; green) immunostained for the glia-specific marker Repo (magenta). All panels show maximum projections of confocal Z-stacks.

(A) Control. (B) Pointed-RNAi. (C) Inhibition of Notch with Hairless. (D) Prospero RNAi. (E) Activation of Notch signaling with Notch<sup>ICD</sup>. (F) Simultaneous activation of Notch and knockdown of Prospero.

(G) Quantification of GFP+/Repo+ cells per segment (n=5 VNCs for each condition). At L1 stage, only Pointed RNAi induces modest reduction in the number of GFP+/Repo+ cells (ANOVA,  $F_{5,24}=2.766$ ,  $p=0.0036$ ). \*,  $p<0.05$  compared to control with Dunnett's post-hoc test. At L3 stage, Pointed RNAi animals were not available due to lethality (n.a.(†)), and there were no differences among the other groups (ANOVA,  $F_{4,20}=0.8299$ ,  $p=0.5218$ ).

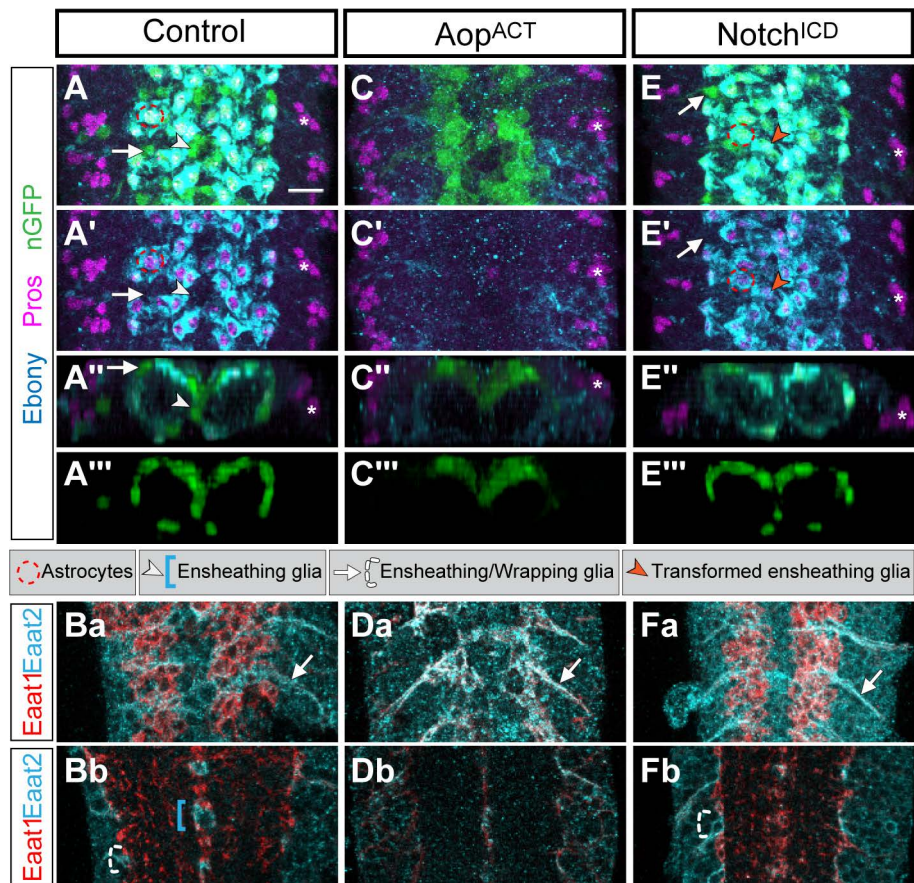

**Figure S2. PntP1 inhibition (with  $Aop^{ACT}$ ) and Notch activation in late-stage embryos.**

(A-E''') Co-labeling of LG nuclei in late stage 17 embryos using *R25H07-Gal4,UAS-nGFP* (nGFP, green) together with Prospero (magenta) and Ebony (cyan). Panels (A-A')-(E-E') are horizontal views of maximum projections of confocal Z-stacks, and panels (A''-E'')-(A'''-E''') are the corresponding transverse 3D reconstructions. Asterisks pinpoint neurons. Scale bar, 10  $\mu$ m. (Ba-Fb) Co-labeling for Eaat1 (red) and Eaat2 (cyan). Single-Z sections at dorsal (Ba-Fa) or medial (Bb-Fb) levels in the neuropil.

(A-Bb) Control. In A-A''', astrocytes express Prospero and Ebony (red stippled circles) but ensheathing glia (arrowheads) and ensheathing/wrapping glia (arrows) do not. Eaat1-positive processes of astrocytes infiltrate the neuropil (Bb). Eaat2 is expressed on ensheathing/wrapping glia (arrow in Ba and white bracket in Bb) and ensheathing glia (blue bracket in Bb).

(C-Db) PntP1 inhibition with *UAS-Aop<sup>ACT</sup>*. In C-C''', Prospero and Ebony expression are dramatically reduced, and LG positioning is abnormal. Eaat1-positive processes are not seen in the neuropil (Db) and co-expression of Eaat1 and Eaat2 increases on surrounding membranes (Da).

(E-Fb) Notch activation with *Notch<sup>ICD</sup>* induces ectopic expression of Prospero and Ebony in ensheathing glia (orange arrowheads in E-E''') but not in ensheathing/wrapping glia (arrows). Eaat2 expression is lost on ensheathing glia membranes. Compare Eaat2 staining near the midline in control (Bb, blue bracket), with its absence near the midline in Fb.

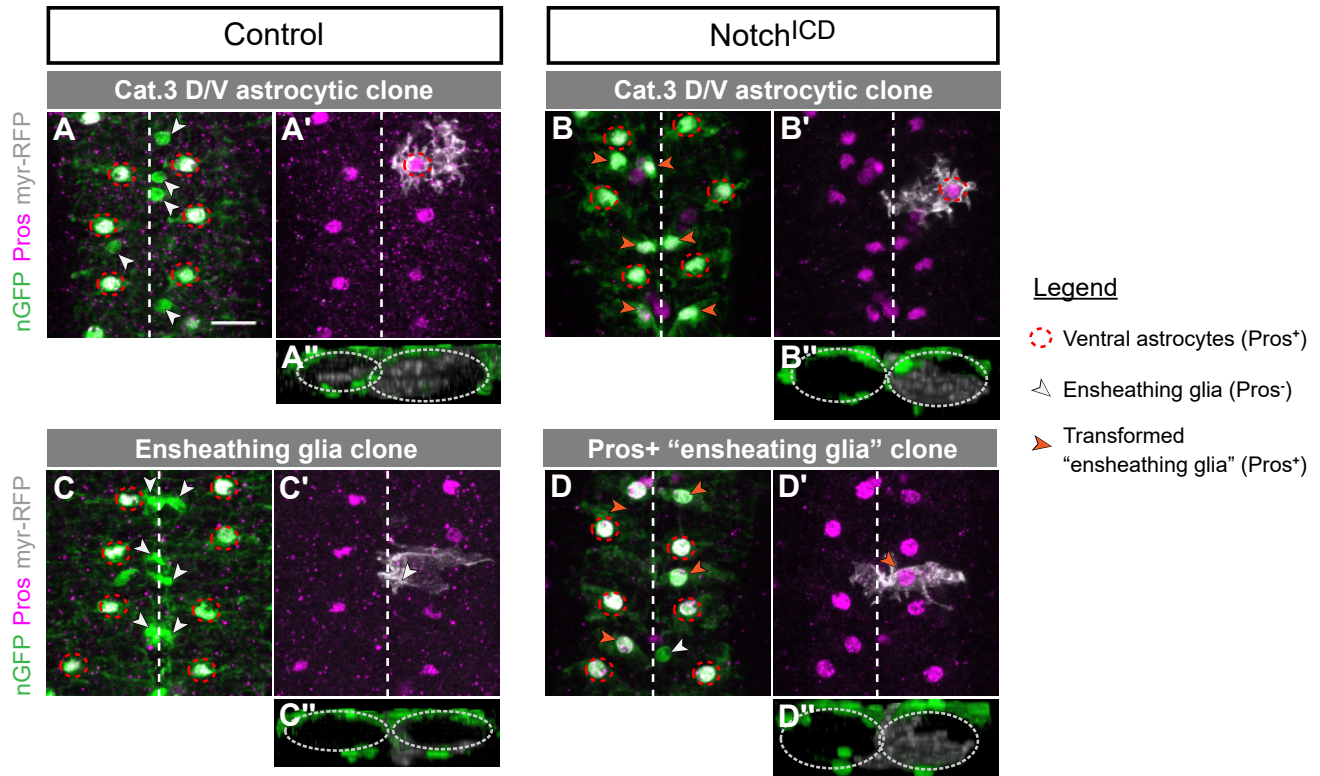

**Figure S3. Blown-OUT clones with activated Notch signaling.**

*R25H07-Gal4* was used to label glial cell nuclei GFP (green), and 2-cell Blown-OUT clones with myr-RFP (white). Prospero (magenta) labels astrocytes. Images are horizontal Z-sections at the most ventral level of the neuropil, except A''-D'', which are transverse views at the level of the clones. Dashed vertical lines mark midline. Dotted ovals outline neuropil. Scale bar, 10 $\mu$ m. Legend applies to all panels.

(A-A'') Control 2-cell astrocyte clone (Cat.3 D/V) in which both cells express Prospero and infiltrate the neuropil (only the ventral cell is shown in A'). (B-B'') Constitutive activation with Notch<sup>ICD</sup> (N<sup>ICD</sup>) has no obvious effect: Cat.3 astrocyte clones resemble controls. (C-C'') Control 2-cell ensheathing glia clone. Neither cell expresses Prospero, but both envelop the neuropil. (D-D'') Constitutive activation of Notch causes ensheathing glia clones (based on cell position) to induce Prospero expression and develop ramified processes that infiltrate the neuropil.
